# Supplementary material for: Greenhouse gas mitigation by agricultural intensification
Source: HighWire-hosted journal article supplement (doi:10.1073/pnas.0914216107), 2010-06-15
Supplement: pnas.200914216SI.pdf [file pnas.200914216SI.pdf]

# Supporting Information

Burney et al. 10.1073/pnas.0914216107

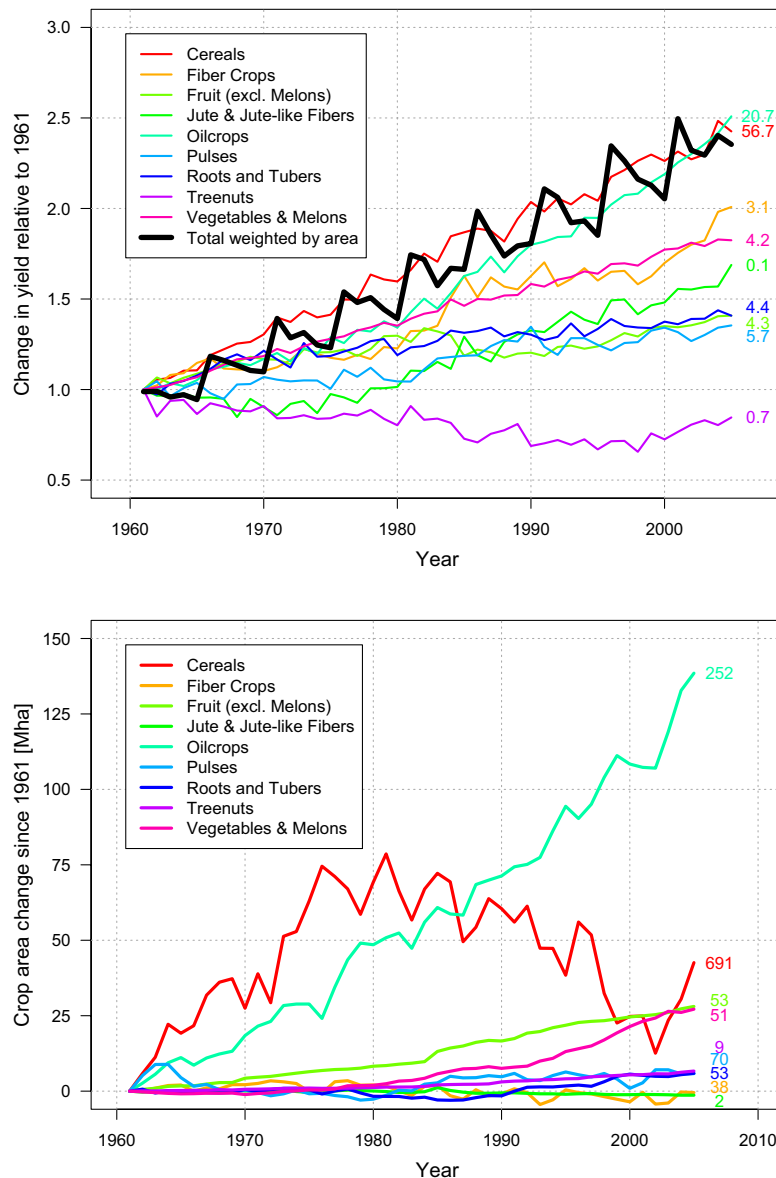

**Fig. S1.** (Upper) Global crop yield relative to 1961, by crop group. Numbers to right of traces indicate percentage of global cropland in 2005. (Lower) Global crop area expansion since 1961, by crop group. Numbers to right of traces indicate total crop area in 2005.

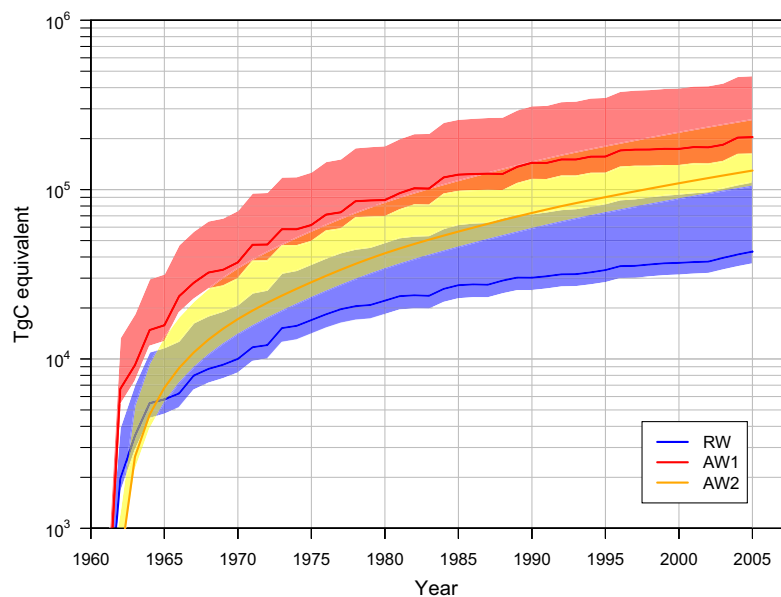





Table S1. Percentage of global crop area by biome, 1961–2005 (1993–2005 values set to percentages calculated from 2000)

|      | Tropical  |           |        | Temperate |            |           | Temperate |           |        | Boreal    |           |        | Evergreen |        |       | Grassland/ |        |           | Open      |      |           | Tundra |        |        | Polar<br>desert/<br>rock/<br>ice |
|------|-----------|-----------|--------|-----------|------------|-----------|-----------|-----------|--------|-----------|-----------|--------|-----------|--------|-------|------------|--------|-----------|-----------|------|-----------|--------|--------|--------|----------------------------------|
|      | evergreen | deciduous | forest | broadleaf | needleleaf | deciduous | forest    | deciduous | forest | evergreen | deciduous | forest | deciduous | forest | mixed | Savanna    | steppe | shrubland | shrubland | Open | shrubland | Tundra | Desert | Desert |                                  |
| 1961 | 9.34      | 9.81      | 9.81   | 3.06      | 7.02       | 13.14     | 1.24      | 0.67      | 11.76  | 16.72     | 16.53     | 5.58   | 3.77      | 0.79   | 0.55  | 0.01       | 0.01   | 0.01      | 0.01      | 0.01 | 0.01      | 0.01   | 0.01   | 0.01   | 0.01                             |
| 1962 | 9.37      | 9.87      | 9.87   | 3.05      | 6.99       | 13.06     | 1.24      | 0.67      | 11.72  | 16.78     | 16.49     | 5.61   | 3.79      | 0.78   | 0.56  | 0.01       | 0.01   | 0.01      | 0.01      | 0.01 | 0.01      | 0.01   | 0.01   | 0.01   | 0.01                             |
| 1963 | 9.45      | 9.88      | 9.88   | 3.06      | 6.92       | 12.99     | 1.23      | 0.66      | 11.65  | 16.83     | 16.52     | 5.66   | 3.80      | 0.78   | 0.56  | 0.01       | 0.01   | 0.01      | 0.01      | 0.01 | 0.01      | 0.01   | 0.01   | 0.01   | 0.01                             |
| 1964 | 9.50      | 9.91      | 9.91   | 3.05      | 6.86       | 12.91     | 1.22      | 0.65      | 11.59  | 16.90     | 16.46     | 5.71   | 3.86      | 0.78   | 0.58  | 0.01       | 0.01   | 0.01      | 0.01      | 0.01 | 0.01      | 0.01   | 0.01   | 0.01   | 0.01                             |
| 1965 | 9.52      | 9.91      | 9.91   | 3.04      | 6.85       | 12.85     | 1.22      | 0.65      | 11.55  | 16.98     | 16.43     | 5.74   | 3.88      | 0.78   | 0.59  | 0.01       | 0.01   | 0.01      | 0.01      | 0.01 | 0.01      | 0.01   | 0.01   | 0.01   | 0.01                             |
| 1966 | 9.55      | 9.93      | 9.93   | 3.04      | 6.81       | 12.81     | 1.20      | 0.64      | 11.47  | 17.05     | 16.45     | 5.78   | 3.88      | 0.77   | 0.60  | 0.01       | 0.01   | 0.01      | 0.01      | 0.01 | 0.01      | 0.01   | 0.01   | 0.01   | 0.01                             |
| 1967 | 9.57      | 9.97      | 9.97   | 3.03      | 6.80       | 12.73     | 1.20      | 0.64      | 11.40  | 17.11     | 16.48     | 5.81   | 3.87      | 0.77   | 0.60  | 0.01       | 0.01   | 0.01      | 0.01      | 0.01 | 0.01      | 0.01   | 0.01   | 0.01   | 0.01                             |
| 1968 | 9.58      | 10.00     | 10.00  | 3.02      | 6.79       | 12.66     | 1.19      | 0.63      | 11.32  | 17.16     | 16.59     | 5.82   | 3.86      | 0.77   | 0.60  | 0.01       | 0.01   | 0.01      | 0.01      | 0.01 | 0.01      | 0.01   | 0.01   | 0.01   | 0.01                             |
| 1969 | 9.58      | 10.00     | 10.00  | 3.02      | 6.79       | 12.60     | 1.18      | 0.63      | 11.25  | 17.28     | 16.55     | 5.87   | 3.87      | 0.76   | 0.60  | 0.01       | 0.01   | 0.01      | 0.01      | 0.01 | 0.01      | 0.01   | 0.01   | 0.01   | 0.01                             |
| 1970 | 9.64      | 10.08     | 10.08  | 3.03      | 6.79       | 12.57     | 1.18      | 0.63      | 11.24  | 17.33     | 16.38     | 5.85   | 3.89      | 0.76   | 0.60  | 0.01       | 0.01   | 0.01      | 0.01      | 0.01 | 0.01      | 0.01   | 0.01   | 0.01   | 0.01                             |
| 1971 | 9.71      | 10.06     | 10.06  | 3.03      | 6.79       | 12.52     | 1.18      | 0.63      | 11.13  | 17.40     | 16.39     | 5.90   | 3.90      | 0.76   | 0.60  | 0.01       | 0.01   | 0.01      | 0.01      | 0.01 | 0.01      | 0.01   | 0.01   | 0.01   | 0.01                             |
| 1972 | 9.79      | 10.12     | 10.12  | 3.01      | 6.76       | 12.42     | 1.17      | 0.63      | 11.05  | 17.45     | 16.40     | 5.92   | 3.91      | 0.76   | 0.60  | 0.01       | 0.01   | 0.01      | 0.01      | 0.01 | 0.01      | 0.01   | 0.01   | 0.01   | 0.01                             |
| 1973 | 9.86      | 10.21     | 10.21  | 3.00      | 6.74       | 12.35     | 1.16      | 0.63      | 11.01  | 17.48     | 16.34     | 5.93   | 3.92      | 0.76   | 0.60  | 0.01       | 0.01   | 0.01      | 0.01      | 0.01 | 0.01      | 0.01   | 0.01   | 0.01   | 0.01                             |
| 1974 | 9.92      | 10.27     | 10.27  | 2.99      | 6.73       | 12.30     | 1.16      | 0.62      | 10.98  | 17.51     | 16.29     | 5.93   | 3.92      | 0.76   | 0.60  | 0.01       | 0.01   | 0.01      | 0.01      | 0.01 | 0.01      | 0.01   | 0.01   | 0.01   | 0.01                             |
| 1975 | 10.00     | 10.33     | 10.33  | 2.97      | 6.73       | 12.24     | 1.16      | 0.62      | 10.95  | 17.59     | 16.17     | 5.91   | 3.94      | 0.75   | 0.61  | 0.01       | 0.01   | 0.01      | 0.01      | 0.01 | 0.01      | 0.01   | 0.01   | 0.01   | 0.01                             |
| 1976 | 10.09     | 10.37     | 10.37  | 2.95      | 6.72       | 12.18     | 1.15      | 0.62      | 10.91  | 17.65     | 16.12     | 5.93   | 3.94      | 0.75   | 0.60  | 0.01       | 0.01   | 0.01      | 0.01      | 0.01 | 0.01      | 0.01   | 0.01   | 0.01   | 0.01                             |
| 1977 | 10.18     | 10.39     | 10.39  | 2.94      | 6.70       | 12.14     | 1.15      | 0.62      | 10.88  | 17.70     | 16.05     | 5.94   | 3.94      | 0.75   | 0.60  | 0.01       | 0.01   | 0.01      | 0.01      | 0.01 | 0.01      | 0.01   | 0.01   | 0.01   | 0.01                             |
| 1978 | 10.24     | 10.44     | 10.44  | 2.92      | 6.69       | 12.10     | 1.15      | 0.61      | 10.85  | 17.76     | 16.00     | 5.95   | 3.93      | 0.75   | 0.60  | 0.01       | 0.01   | 0.01      | 0.01      | 0.01 | 0.01      | 0.01   | 0.01   | 0.01   | 0.01                             |
| 1979 | 10.30     | 10.42     | 10.42  | 2.92      | 6.65       | 11.99     | 1.15      | 0.61      | 10.65  | 17.78     | 16.17     | 6.06   | 3.96      | 0.74   | 0.60  | 0.01       | 0.01   | 0.01      | 0.01      | 0.01 | 0.01      | 0.01   | 0.01   | 0.01   | 0.01                             |
| 1980 | 10.39     | 10.45     | 10.45  | 2.92      | 6.62       | 11.92     | 1.15      | 0.61      | 10.64  | 17.85     | 16.11     | 6.06   | 3.93      | 0.75   | 0.60  | 0.01       | 0.01   | 0.01      | 0.01      | 0.01 | 0.01      | 0.01   | 0.01   | 0.01   | 0.01                             |
| 1981 | 10.41     | 10.48     | 10.48  | 2.92      | 6.60       | 11.86     | 1.15      | 0.61      | 10.62  | 17.87     | 16.10     | 6.11   | 3.93      | 0.74   | 0.60  | 0.01       | 0.01   | 0.01      | 0.01      | 0.01 | 0.01      | 0.01   | 0.01   | 0.01   | 0.01                             |
| 1982 | 10.45     | 10.54     | 10.54  | 2.89      | 6.56       | 11.81     | 1.15      | 0.60      | 10.59  | 17.88     | 16.08     | 6.15   | 3.93      | 0.74   | 0.60  | 0.01       | 0.01   | 0.01      | 0.01      | 0.01 | 0.01      | 0.01   | 0.01   | 0.01   | 0.01                             |
| 1983 | 10.50     | 10.59     | 10.59  | 2.88      | 6.53       | 11.76     | 1.14      | 0.60      | 10.57  | 17.93     | 16.09     | 6.13   | 3.92      | 0.74   | 0.60  | 0.01       | 0.01   | 0.01      | 0.01      | 0.01 | 0.01      | 0.01   | 0.01   | 0.01   | 0.01                             |
| 1984 | 10.54     | 10.62     | 10.62  | 2.87      | 6.50       | 11.73     | 1.14      | 0.60      | 10.52  | 17.98     | 16.07     | 6.15   | 3.91      | 0.74   | 0.60  | 0.01       | 0.01   | 0.01      | 0.01      | 0.01 | 0.01      | 0.01   | 0.01   | 0.01   | 0.01                             |
| 1985 | 10.68     | 10.67     | 10.67  | 2.85      | 6.45       | 11.67     | 1.14      | 0.60      | 10.47  | 18.02     | 16.01     | 6.16   | 3.92      | 0.73   | 0.60  | 0.01       | 0.01   | 0.01      | 0.01      | 0.01 | 0.01      | 0.01   | 0.01   | 0.01   | 0.01                             |
| 1986 | 10.79     | 10.72     | 10.72  | 2.84      | 6.40       | 11.61     | 1.14      | 0.60      | 10.42  | 18.04     | 15.99     | 6.16   | 3.92      | 0.73   | 0.61  | 0.01       | 0.01   | 0.01      | 0.01      | 0.01 | 0.01      | 0.01   | 0.01   | 0.01   | 0.01                             |
| 1987 | 10.91     | 10.77     | 10.77  | 2.84      | 6.37       | 11.56     | 1.14      | 0.60      | 10.38  | 18.01     | 15.96     | 6.19   | 3.93      | 0.73   | 0.61  | 0.01       | 0.01   | 0.01      | 0.01      | 0.01 | 0.01      | 0.01   | 0.01   | 0.01   | 0.01                             |
| 1988 | 10.98     | 10.78     | 10.78  | 2.84      | 6.35       | 11.52     | 1.14      | 0.60      | 10.35  | 18.02     | 15.94     | 6.18   | 3.95      | 0.73   | 0.62  | 0.01       | 0.01   | 0.01      | 0.01      | 0.01 | 0.01      | 0.01   | 0.01   | 0.01   | 0.01                             |
| 1989 | 11.00     | 10.80     | 10.80  | 2.84      | 6.33       | 11.49     | 1.13      | 0.59      | 10.35  | 18.01     | 15.93     | 6.21   | 3.95      | 0.73   | 0.62  | 0.01       | 0.01   | 0.01      | 0.01      | 0.01 | 0.01      | 0.01   | 0.01   | 0.01   | 0.01                             |
| 1990 | 11.09     | 10.81     | 10.81  | 2.84      | 6.32       | 11.48     | 1.13      | 0.59      | 10.34  | 17.98     | 15.91     | 6.18   | 3.96      | 0.73   | 0.62  | 0.01       | 0.01   | 0.01      | 0.01      | 0.01 | 0.01      | 0.01   | 0.01   | 0.01   | 0.01                             |
| 1991 | 10.98     | 10.85     | 10.85  | 2.85      | 6.34       | 11.45     | 1.13      | 0.59      | 10.36  | 18.01     | 15.94     | 6.18   | 3.96      | 0.73   | 0.62  | 0.01       | 0.01   | 0.01      | 0.01      | 0.01 | 0.01      | 0.01   | 0.01   | 0.01   | 0.01                             |
| 1992 | 11.23     | 10.83     | 10.83  | 2.84      | 6.33       | 11.35     | 1.13      | 0.59      | 10.32  | 17.99     | 15.90     | 6.16   | 3.95      | 0.73   | 0.63  | 0.01       | 0.01   | 0.01      | 0.01      | 0.01 | 0.01      | 0.01   | 0.01   | 0.01   | 0.01                             |
| 1993 | 12.06     | 10.55     | 10.55  | 1.83      | 4.82       | 9.69      | 0.60      | 0.26      | 7.70   | 20.09     | 18.25     | 7.16   | 5.83      | 0.29   | 0.87  | 0.01       | 0.01   | 0.01      | 0.01      | 0.01 | 0.01      | 0.01   | 0.01   | 0.01   | 0.01                             |
| 1994 | 12.06     | 10.55     | 10.55  | 1.83      | 4.82       | 9.69      | 0.60      | 0.26      | 7.70   | 20.09     | 18.25     | 7.16   | 5.83      | 0.29   | 0.87  | 0.01       | 0.01   | 0.01      | 0.01      | 0.01 | 0.01      | 0.01   | 0.01   | 0.01   | 0.01                             |
| 1995 | 12.06     | 10.55     | 10.55  | 1.83      | 4.82       | 9.69      | 0.60      | 0.26      | 7.70   | 20.09     | 18.25     | 7.16   | 5.83      | 0.29   | 0.87  | 0.01       | 0.01   | 0.01      | 0.01      | 0.01 | 0.01      | 0.01   | 0.01   | 0.01   | 0.01                             |
| 1996 | 12.06     | 10.55     | 10.55  | 1.83      | 4.82       | 9.69      | 0.60      | 0.26      | 7.70   | 20.09     | 18.25     | 7.16   | 5.83      | 0.29   | 0.87  | 0.01       | 0.01   | 0.01      | 0.01      | 0.01 | 0.01      | 0.01   | 0.01   | 0.01   | 0.01                             |
| 1997 | 12.06     | 10.55     | 10.55  | 1.83      | 4.82       | 9.69      | 0.60      | 0.26      | 7.70   | 20.09     | 18.25     | 7.16   | 5.83      | 0.29   | 0.87  | 0.01       | 0.01   | 0.01      | 0.01      | 0.01 | 0.01      | 0.01   | 0.01   | 0.01   | 0.01                             |
| 1998 | 12.06     | 10.55     | 10.55  | 1.83      | 4.82       | 9.69      | 0.60      | 0.26      | 7.70   | 20.09     | 18.25     | 7.16   | 5.83      | 0.29   | 0.87  | 0.01       | 0.01   | 0.01      | 0.01      | 0.01 | 0.01      | 0.01   | 0.01   | 0.01   | 0.01                             |
| 1999 | 12.06     | 10.55     | 10.55  | 1.83      | 4.82       | 9.69      | 0.60      | 0.26      | 7.70   | 20.09     | 18.25     | 7.16   | 5.83      | 0.29   | 0.87  | 0.01       | 0.01   | 0.01      | 0.01      | 0.01 | 0.01      | 0.01   | 0.01   | 0.01   | 0.01                             |
| 2000 | 12.06     | 10.55     | 10.55  | 1.83      | 4.82       | 9.69      | 0.60      | 0.26      | 7.70   | 20.09     | 18.25     | 7.16   | 5.83      | 0.29   | 0.87  | 0.01       | 0.01   | 0.01      | 0.01      | 0.01 | 0.01      | 0.01   | 0.01   | 0.01   | 0.01                             |
| 2001 | 12.06     | 10.55     | 10.55  | 1.83      | 4.82       | 9.69      | 0.60      | 0.26      | 7.70   | 20.09     | 18.25     | 7.16   | 5.83      | 0.29   | 0.87  | 0.01       | 0.01   | 0.01      | 0.01      | 0.01 | 0.01      | 0.01   | 0.01   | 0.01   | 0.01                             |
| 2002 | 12.06     | 10.55     | 10.55  | 1.83      | 4.82       | 9.69      | 0.60      | 0.26      | 7.70   | 20.09     | 18.25     | 7.16   | 5.83      | 0.29   | 0.87  | 0.01       | 0.01   | 0.01      | 0.01      | 0.01 | 0.01      | 0.01   | 0.01   | 0.01   | 0.01                             |
| 2003 | 12.06     | 10.55     | 10.55  | 1.83      | 4.82       | 9.69      | 0.60      | 0.26      | 7.70   | 20.09     | 18.25     | 7.16   | 5.83      | 0.29   | 0.87  | 0.01       | 0.01   | 0.01      | 0.01      | 0.01 | 0.01      | 0.01   | 0.01   | 0.01   | 0.01                             |
| 2004 | 12.06     | 10.55     | 10.55  | 1.83      | 4.82       | 9.69      | 0.60      | 0.26      | 7.70   | 20.09     | 18.25     | 7.16   | 5.83      | 0.29   | 0.87  | 0.01       | 0.01   | 0.01      | 0.01      | 0.01 | 0.01      | 0.01   | 0.01   | 0.01   | 0.01                             |
| 2005 | 12.06     | 10.55     | 10.55  | 1.83      | 4.82       | 9.69      | 0.60      | 0.26      | 7.70   | 20.09     | 18.25     | 7.16   | 5.83      | 0.29   | 0.87  | 0.01       | 0.01   | 0.01      | 0.01      | 0.01 | 0.01      | 0.01   | 0.01   | 0.01   | 0.01                             |

**Table S2. Biomass and soil organic carbon values by biome**

| Biome                                 | Biomass carbon, t/ha | Soil organic carbon, t/ha | Source                 |
|---------------------------------------|----------------------|---------------------------|------------------------|
| Tropical evergreen forest             | 210                  | 72                        | Gibbs et al. (1)       |
| Tropical deciduous forest             | 132                  | 72                        | Gibbs et al. (1)       |
| Temperate broadleaf evergreen forest  | 100                  | 101                       | Houghton (2)           |
| Temperate needleleaf evergreen forest | 160                  | 101                       | Houghton (2)           |
| Temperate deciduous forest            | 135                  | 101                       | Houghton (2)           |
| Boreal evergreen forest               | 90                   | 155                       | Houghton (2)           |
| Boreal deciduous forest               | 90                   | 155                       | Houghton (2)           |
| Evergreen/deciduous mixed forest      | 145                  | 101                       | Houghton (2), estimate |
| Savanna                               | 43                   | 55                        | Gibbs et al. (1)       |
| Grassland/steppe                      | 8                    | 59                        | Gibbs et al. (1)       |
| Dense shrubland                       | 69                   | 59                        | Gibbs et al. (1)       |
| Open shrubland                        | 31                   | 59                        | Gibbs et al. (1)       |
| Tundra                                | 1                    | 1                         | Estimate               |
| Desert                                | 1                    | 1                         | Estimate               |
| Polar desert/rock/ice                 | 1                    | 1                         | Estimate               |

1. Gibbs HK, et al. (2008) Carbon payback times for crop-based biofuel expansion in the tropics: The effects of changing yield and technology. *Environ Res Lett* 3:034001.
2. Houghton RA (1999) The annual net flux of carbon to the atmosphere from changes in land use, 1850–1990. *Tellus B* 51:298–313.
